# Supplementary material for: Activity Change in Response to Bad Air Quality, National Health and Nutrition Examination Survey, 2007–2010
Source: PubMed Central journal article supplement (PMC3511511; doi:10.1371/journal.pone.0050526), 2012-11-30
Supplement: pone.0050526.s004.pdf [file pone.0050526.s004.pdf]

**Activity change in response to bad air quality,  
National Health and Nutrition Examination Survey, 2007-2010**

**Table S3. Odds ratio (95% confidence interval) for adjusted models predicting changing activity due to bad air quality, comparing the population with and without those who had no knowledge about air quality, NHANES 2007-2010.**

| <b>Characteristic</b>                    | <b>Including not informed<sup>a, b</sup></b> | <b>Excluding not informed<sup>a</sup></b> |
|------------------------------------------|----------------------------------------------|-------------------------------------------|
| N                                        | 10,898                                       | 10,200                                    |
| Susceptible category (ref: none)         |                                              |                                           |
| Respiratory                              | 2.61 (2.03, 3.35)                            | 2.63 (2.04, 3.38)                         |
| Cardiovascular                           | 1.33 (0.86, 2.04)                            | 1.33 (0.86, 2.07)                         |
| ≥ 65 years                               | 1.22 (0.95, 1.57)                            | 1.22 (0.95, 1.57)                         |
| Respiratory and cardiovascular           | 4.36 (2.47, 7.69)                            | 4.37 (2.45, 7.80)                         |
| Respiratory and ≥ 65 years               | 3.83 (2.47, 5.96)                            | 3.98 (2.52, 6.29)                         |
| Cardiovascular and ≥ 65 years            | 1.38 (0.89, 2.13)                            | 1.39 (0.89, 2.15)                         |
| All three groups                         | 3.52 (2.33, 5.32)                            | 3.65 (2.35, 5.64)                         |
| Female (vs. male)                        | 1.54 (1.34, 1.78)                            | 1.56 (1.35, 1.81)                         |
| Education (ref: < high school)           |                                              |                                           |
| High school degree                       | 1.46 (1.12, 1.90)                            | 1.42 (1.10, 1.83)                         |
| Some college or 2-year degree            | 1.87 (1.49, 2.34)                            | 1.87 (1.51, 2.33)                         |
| 4-year degree or higher                  | 2.27 (1.67, 3.09)                            | 2.23 (1.64, 3.04)                         |
| Race/ethnicity (ref: non-Hispanic white) |                                              |                                           |
| Non-Hispanic black                       | 1.28 (0.93, 1.76)                            | 1.20 (0.87, 1.66)                         |
| Hispanic                                 | 0.84 (0.61, 1.16)                            | 0.84 (0.61, 1.17)                         |
| Other                                    | 1.22 (0.87, 1.70)                            | 1.21 (0.86, 1.72)                         |
| Smoking status (ref: nonsmoker)          |                                              |                                           |
| Passive smoke exposure                   | 0.88 (0.57, 1.35)                            | 0.90 (0.58, 1.41)                         |
| Active smoker                            | 0.90 (0.74, 1.09)                            | 0.87 (0.72, 1.06)                         |
| Body mass index (ref: normal weight)     |                                              |                                           |
| Overweight                               | 1.10 (0.89, 1.37)                            | 1.11 (0.89, 1.39)                         |
| Obese                                    | 1.13 (0.96, 1.34)                            | 1.14 (0.96, 1.35)                         |

NHANES = National Health and Nutrition Examination Survey.

- a. Odds ratios and confidence intervals account for survey design, weights, and non-response. Both models adjust for all variables shown.
- b. This is the same as the adjusted model, Table 3 in the main article.
